# Supplementary material for: Autophagy modulates lipid metabolism to maintain metabolic flexibility for Lkb1-deficient Kras-driven lung tumorigenesis
Source: PubMed Central journal article supplement — Genes Dev. 2019 Feb 1;33(3-4):150–65. doi: 10.1101/gad.320481.118 (PMC6362813; doi:10.1101/gad.320481.118), 2019-02-01

1 **RE: GENESDEV/2018/320481**  
2  
3  
4

5 **Autophagy Modulates Lipid Metabolism to Maintain Metabolic Flexibility for *Lkb1*-**  
6 **Deficient *Kras*-Driven Lung Tumorigenesis**  
7

8 Vrushank Bhatt<sup>1</sup>, Khoosheh Khayati<sup>1</sup>, Zhixian Sherrie Hu<sup>1</sup>, Amy Lee<sup>1</sup>, Wali Kamran<sup>1</sup>,  
9 Xiaoyang Su<sup>1,2</sup>, Jessie Yanxiang Guo<sup>1,2,3</sup> #

10 <sup>1</sup>Rutgers Cancer Institute of New Jersey, New Brunswick, NJ 08901;

11 <sup>2</sup>Department of Medicine, Rutgers Robert Wood Johnson Medical School, New  
12 Brunswick, NJ 08901;

13 <sup>3</sup>Department of Chemical Biology, Rutgers Ernest Mario School of Pharmacy,  
14 Piscataway, NJ 08854 USA;

15 #Corresponding Author  
16  
17

18 **Running Title: Autophagy Supports *Lkb1*-Deficient Lung Tumorigenesis**  
19  
20

21 **Keywords: Autophagy, LKB1, non-small cell lung cancer, lipid metabolism, energy**  
22 **metabolism**  
23  
24  
25

26 **Corresponding Author:**

27 Jessie Yanxiang Guo, Ph.D.

28 Rutgers Cancer Institute of New Jersey

29 RBHS-Robert Wood Johnson Medical School

30 Rutgers, The State University of New Jersey

31 195 Little Albany Street

32 New Brunswick, NJ 08903-2681

33 [yanxiang@cinj.rutgers.edu](mailto:yanxiang@cinj.rutgers.edu)

34 Voice: 732-235-9657

1 **Supplementary Data**

2 **Supplemental materials and methods**

3 **Metabolomic analysis by LC-MS**

4 Metabolites extraction for LC-MS analysis.

5 To extracting metabolites from cells, *Atg7<sup>+/+</sup>* and *Atg7<sup>-/-</sup>* TDCLs cultured in 6-cm dishes in  
6 triplicate were treated with RPMI, HBSS and HBSS with glutamine for 1 hour and then  
7 quickly washed twice with PBS; subsequently, cells were incubated with 1 mL of 40:40:20  
8 methanol:acetonitrile:water with 0.5% formic acid solution on ice for 5 minutes followed  
9 by neutralization with 50 $\mu$ L of 15% ammonium bicarbonate. The cells were then scrapped  
10 from the plates using a cell lifter, transferred to 1.5 mL freshly labeled tubes on ice and  
11 centrifuged at 4°C for 10 min at 13,000 rpm. The supernatants were transferred to LC–  
12 MS autosampler vials (on ice) and sent for LC-MS analysis.

13

14 To extract metabolites from lung tumors, at 18 weeks of post-Lenti-Cre infection, the mice  
15 bearing *Atg7<sup>+/+</sup>* and *Atg7<sup>-/-</sup>* KL lung tumors was euthanized and lung tumors were quickly  
16 dissected and snap frozen in liquid nitrogen with pre-cooled Wollenberger clamp.  
17 Subsequently, frozen tissue samples were first weighed (~20-30 mg each sample) and  
18 ground using a Cryomill (Retsch, Newtown, PA) in liquid nitrogen at 25Hz for 2 min. The  
19 resulting powder was then mixed with –20°C 40:40:20 methanol:acetonitrile:water with  
20 0.5% formic acid, followed by 10 sec vortexing, 10min incubation on ice, neutralization  
21 with 50 $\mu$ L/mL of 15% ammonium bicarbonate, and 10 min centrifugation at 4°C and  
22 16,000g. The supernatants were transferred to LC–MS autosampler vials (on ice) and  
23 sent for LC-MS analysis.

1 LC-MS analysis of the cellular metabolites was performed on the Q Exactive PLUS hybrid  
2 quadrupole-orbitrap mass spectrometer (Thermo Scientific) coupled to hydrophilic  
3 interaction chromatography (HILIC). The LC separation was performed on UltiMate 3000  
4 UHPLC system with an XBridge BEH Amide column (150 mm × 2.1 mm, 2.5 μM particle  
5 size, Waters, Milford, MA) with the corresponding XP VanGuard Cartridge. The liquid  
6 chromatography used a gradient of solvent A (95%:5% H<sub>2</sub>O:acetonitrile with 20 mM  
7 ammonium acetate, 20 mM ammonium hydroxide, pH 9.4), and solvent B (20%:80%  
8 H<sub>2</sub>O:acetonitrile with 20 mM ammonium acetate, 20 mM ammonium hydroxide, pH 9.4).  
9 The gradient was 0 min, 100% B; 3 min, 100% B; 3.2 min, 90% B; 6.2 min, 90% B; 6.5  
10 min, 80% B; 10.5 min, 80% B; 10.7 min, 70% B; 13.5 min, 70% B; 13.7 min, 45% B; 16  
11 min, 45% B; 16.5 min, 100% B. The flow rate was 300 μl/min. Injection volume was 5 μL  
12 and column temperature 25 °C. The MS scans were in negative ion mode with a resolution  
13 of 70,000 at m/z 200. The automatic gain control (AGC) target was 3 × 10<sup>6</sup> and the scan  
14 range was 75–1000. Metabolite features were extracted in MAVEN (Cite: PMID  
15 21049934).

16

### 17 **Analysis of saponified FAs by LC-MS**

18 To extract saponified FAs for LC-MS analysis, *Atg7<sup>+/+</sup>* and *Atg7<sup>-/-</sup>* TDCL clones cultured  
19 in 6-cm dishes were assessed in triplicate. TDCLs were cultured in normal RPMI and  
20 HBSS starvation conditions for 4 hours; subsequently cells were rinsed twice with 2 mL  
21 of 37°C PBS, followed by adding 1 mL of -20°C 90% methanol with 0.3M potassium  
22 hydroxide. The resulting liquid and cell debris were scraped into 4 mL glass tubes. The  
23 samples were heated at 80°C for 1 hour to saponify FAs, followed by acidification with

1 100 $\mu$ L of formic acid. The mixture was then vortexed for 1 min and the samples were  
2 extracted twice with 1 mL of hexane, dried under N<sub>2</sub>, and dissolved in 1:1:1  
3 methanol:chloroform:isopropanol to a final concentration of 2 $\mu$ L of cell volume per  
4 milliliter for LC-MS analysis.

5

6 The LC separation of FAs was performed on UltiMate 3000 UHPLC system with an  
7 Agilent InfinityLab Poroshell 120 EC-C18 (2.1\*150mm, 2.7 $\mu$ m) column. The liquid  
8 chromatography used a gradient of solvent A (90%:10% H<sub>2</sub>O:Methanol with 1 mM  
9 ammonium acetate, 35 mM acetic acid), and solvent B (2%:98% H<sub>2</sub>O:isopropanol with 1  
10 mM ammonium acetate, 35 mM acetic acid). The gradient was 0 min, 25% B; 2 min, 25%  
11 B; 5.5 min, 65% B; 9.5 min, 100% B; 13.5 min, 100% B; 14 min, 25% B; 20 min, 25% B.

12 The flow rate was 200  $\mu$ L/min. Injection volume was 2  $\mu$ L and column temperature 45 °C.

13 The MS scans were in negative ion mode with a resolution of 70,000 at m/z 200. The  
14 automatic gain control (AGC) target was  $3 \times 10^6$  and the scan range was 200–1000.

15 Metabolite features were extracted in MAVEN. The <sup>13</sup>C isotope natural abundance and  
16 impurity of labeled substrate was corrected using AccuCor written in R (Cite: PMID  
17 28471646).

18

### 19 **Lipidomic analysis by LC-MS**

20 To extract lipids for LC-MS analysis, cells were cultured in 6-cm dishes in RPMI. The  
21 following day, cells were rinsed twice with 2 mL of 37°C PBS, followed by 1 mL of cold (-  
22 20°C) 0.1M HCl:methanol (1:1). The resulting liquid and cell debris were scraped into 4  
23 mL glass tubes. 500 $\mu$ L of cold chloroform was added. The mixture was vortexed for 1 min

1 and centrifuges at 4C for 5 min at 18,000g. The lower chloroform phase was transferred  
2 to a freshly labeled glass vial, dried under N<sub>2</sub>, and dissolved in 1:1:1  
3 methanol:chloroform:isopropanol to a final concentration of 2 $\mu$ L of cell volume per  
4 milliliter for LC-MS analysis.

5

6 The LC separation of lipids was performed on UltiMate 3000 UHPLC system with an  
7 Agilent InfinityLab Poroshell 120 EC-C18 (2.1\*150mm, 2.7 $\mu$ m) column. The liquid  
8 chromatography used a gradient of solvent A (90%:10% H<sub>2</sub>O:Methanol with 1 mM  
9 ammonium acetate, 35 mM acetic acid), and solvent B (2%:98% H<sub>2</sub>O:isopropanol with 1  
10 mM ammonium acetate, 35 mM acetic acid). The gradient was 0 min, 25% B; 2 min, 25%  
11 B; 5.5 min, 65% B; 12.5 min, 100% B; 16.5 min, 100% B; 17 min, 25% B; 30 min, 25% B.

12 The flow rate was 200  $\mu$ l/min. Injection volume was 2  $\mu$ L and column temperature 45 °C.

13 The MS scans were in positive ion mode with a resolution of 70,000 at m/z 200. The  
14 automatic gain control (AGC) target was  $3 \times 10^6$  and the scan range was 200–1000.

15 Metabolite features were extracted in MAVEN.

16

## 17 **Supplemental Figure Legends**

18 **S1. Loss of Lkb1 causes KL tumors to be selective against autophagy-defective**

19 **tumor growth.** A. PCR shows mouse genotyping. B. IHC of Lkb1, Atg7, p62 and LC3

20 shows that Lkb1 was deleted in KL tumors, but Atg7 was incompletely deleted in KL

21 tumors in mice infected with Adenoviral-Cre. Accumulation of p62 and LC3 indicates

22 autophagy blockade. C. IHC of Lkb1 and Atg7 in Lkb1<sup>+/+</sup>;Kras<sup>G12D/+</sup> (K) tumors to show

23 Atg7 was homogenously deleted in K tumors induced by Adenoviral-Cre. D. WB of Atg5-

1 12 and LC3 of KL tumor samples shows that autophagy is active in one *Atg7<sup>-/-</sup>* KL tumor  
2 marked in red (mouse ID 8136). E. Kaplan-Meier survival curve of mice bearing KL tumors  
3 that were intranasally infected with Adenoviral-Cre (P= 0.05, log-rank test).

4

5 **S2. Autophagy ablation impairs KL lung tumorigenesis in mice intranasally**  
6 **infected with Lenti-Cre.**

7 A. Representative histology of scanned lung sections of KL and KP mice at the indicated  
8 times post Lenti-Cre infection. B. Representative IHC of *Lkb1* in low magnification to show  
9 that *Lkb1* is homogeneously deleted in all tumors and *Atg7* deletion impairs KL tumor  
10 growth. C & D. Representative IHC of *Atg7* at high (C) and low (D) magnification at the  
11 indicated times. E. Representative IHC of p62 and LC3 to show autophagy ablation in  
12 *Atg7<sup>-/-</sup>* KL tumors at 14 weeks post-infection (Red arrow indicates autophagosome in  
13 *Atg7<sup>+/+</sup>* tumors; black arrow indicates LC3 aggregates in *Atg7<sup>-/-</sup>* tumors).

14

15 **S3. Autophagy deficiency impairs oncogenic signaling.**

16 A. Representative H&E of KL lung tumors at low magnification at the indicated times. B.  
17 Representative H&E of *Atg7<sup>-/-</sup>* KL lung tumors at 29 weeks post-Lenti-Cre infection: I.  
18 scanned lung section (I: inflammation; A: adenocarcinoma; S: squamous cell carcinoma).  
19 II. Representative H&E of adenocarcinoma (ADC). III. Representative H&E of lung  
20 inflammation (INF). IV. Representative H&E of squamous cell carcinoma (SCC). C-E.  
21 Representative IHC of pS6 (C), pERK (D) and Ki67 (E) at low magnification at the  
22 indicated time points.

23

1 **S4. Characterization of KL TDCLs.**

2 A. WB of Atg7, Atg5-Atg12 and LC3 shows autophagy activity was blocked by Atg7  
3 deletion in KL TDCLs. Red indicates Atg7 was not deleted in “*Atg7<sup>-/-</sup>*” TDCL clones. B.  
4 Characterization of TDCLs by PCR. Red indicates that *Flox* of *Atg7* was not deleted in  
5 “*Atg7<sup>-/-</sup>*” TDCL clones. C. WB of Atg7 shows that Atg7 was deleted in *Atg7<sup>flox/flox</sup>* KL cells  
6 treated with Adenoviral-Cre. D. Relative cell proliferation of KL cells without (*Atg7<sup>flox/flox</sup>*)  
7 or with acute Atg7 deletion (*Atg7<sup>del/del</sup>*) by Adenoviral-Cre in nutrient-rich RPMI medium.  
8 E. Clonogenic survival assay shows Atg7 deletion by Adenoviral-Cre increased the  
9 sensitivity of KL TDCLs to HBSS starvation-induced cell death, which was rescued by  
10 glutamine (2mM) or BSA-Pal (20μM). F. WB of Atg5-12, LC3 and β-actin of KL TDCLs.  
11 G. Relative cell proliferation of *Atg7<sup>+/+</sup>* KL TDCLs without or with Atg5 knockdown in  
12 nutrient-rich RPMI medium. H. Clonogenic survival assay of *KL* TDCLs without or with  
13 Atg5 knockdown in HBSS or HBSS supplemented with glutamine (2mM) or BSA-Pal  
14 (20μM).

15

16 **S5. Autophagy mediates metabolites recycling in starvation.** A. Levels of metabolites  
17 in normal RPMI and HBSS starvation in *Atg7<sup>+/+</sup>* and *Atg7<sup>-/-</sup>* TDCLs after 1 hour treatment.  
18 B. Amino acids consumption of TDCLs in nutrient-rich conditions shows Atg7 depletion  
19 upregulates the consumption of serine, methionine and threonine. Each bar represents  
20 the average of four clones from *Atg7<sup>+/+</sup>* or *Atg7<sup>-/-</sup>* TDCLs. (\* P<0.05, \*\* P<0.01, \*\*\* P<  
21 0.001).

22

23 **S6. Autophagy deficiency promotes nucleotide degradation in starvation.**

1 A. Schematic of nucleotide degradation. B. The levels of substrates from nucleotide  
2 degradation in normal and HBSS starvation in TDCLs show *Atg7* depletion promotes  
3 nucleotide catabolism. C. Clonogenic survival assay of TDCLs in HBSS supplemented  
4 with nucleosides (2mM). (\* P<0.05, \*\*\* P< 0.001).

5

6 **S7. Autophagy deficiency alters the lipid metabolism of *Lkb1*-deficient cells.** A.  
7 [<sup>13</sup>C6] glucose tracer labeling to FAs of KL TDCLs shows that *Atg7* depletion promotes  
8 *de novo* FA synthesis and inhibits elongation. B. Clonogenic survival assay of *Atg7*<sup>+/+</sup> and  
9 *Atg7*<sup>-/-</sup> KL TDCLs in nutrient-rich RPMI condition supplemented without or with Fasnall  
10 (50μM). C. Cell proliferation of *Atg7*<sup>+/+</sup> and *Atg7*<sup>-/-</sup> cells in nutrient-rich RPMI condition  
11 treated without or with ETO (50μM). (\* P<0.05, \*\* P<0.01, \*\*\* P< 0.001). D. WB of ATG5-  
12 12, LC3 and β-actin of human lung cancer cells without or with ATG5 knockdown. E.  
13 Relative cell proliferation of *LKB1*-mutant human lung cancer cells without or with ATG5  
14 knockdown in nutrient-rich RPMI medium. F. Clonogenic survival assay of *LKB1*-mutant  
15 human lung cancer cells without or with ATG5 knockdown in HBSS or HBSS  
16 supplemented with glutamine (2mM), BSA or BSA-Pal (20μM).



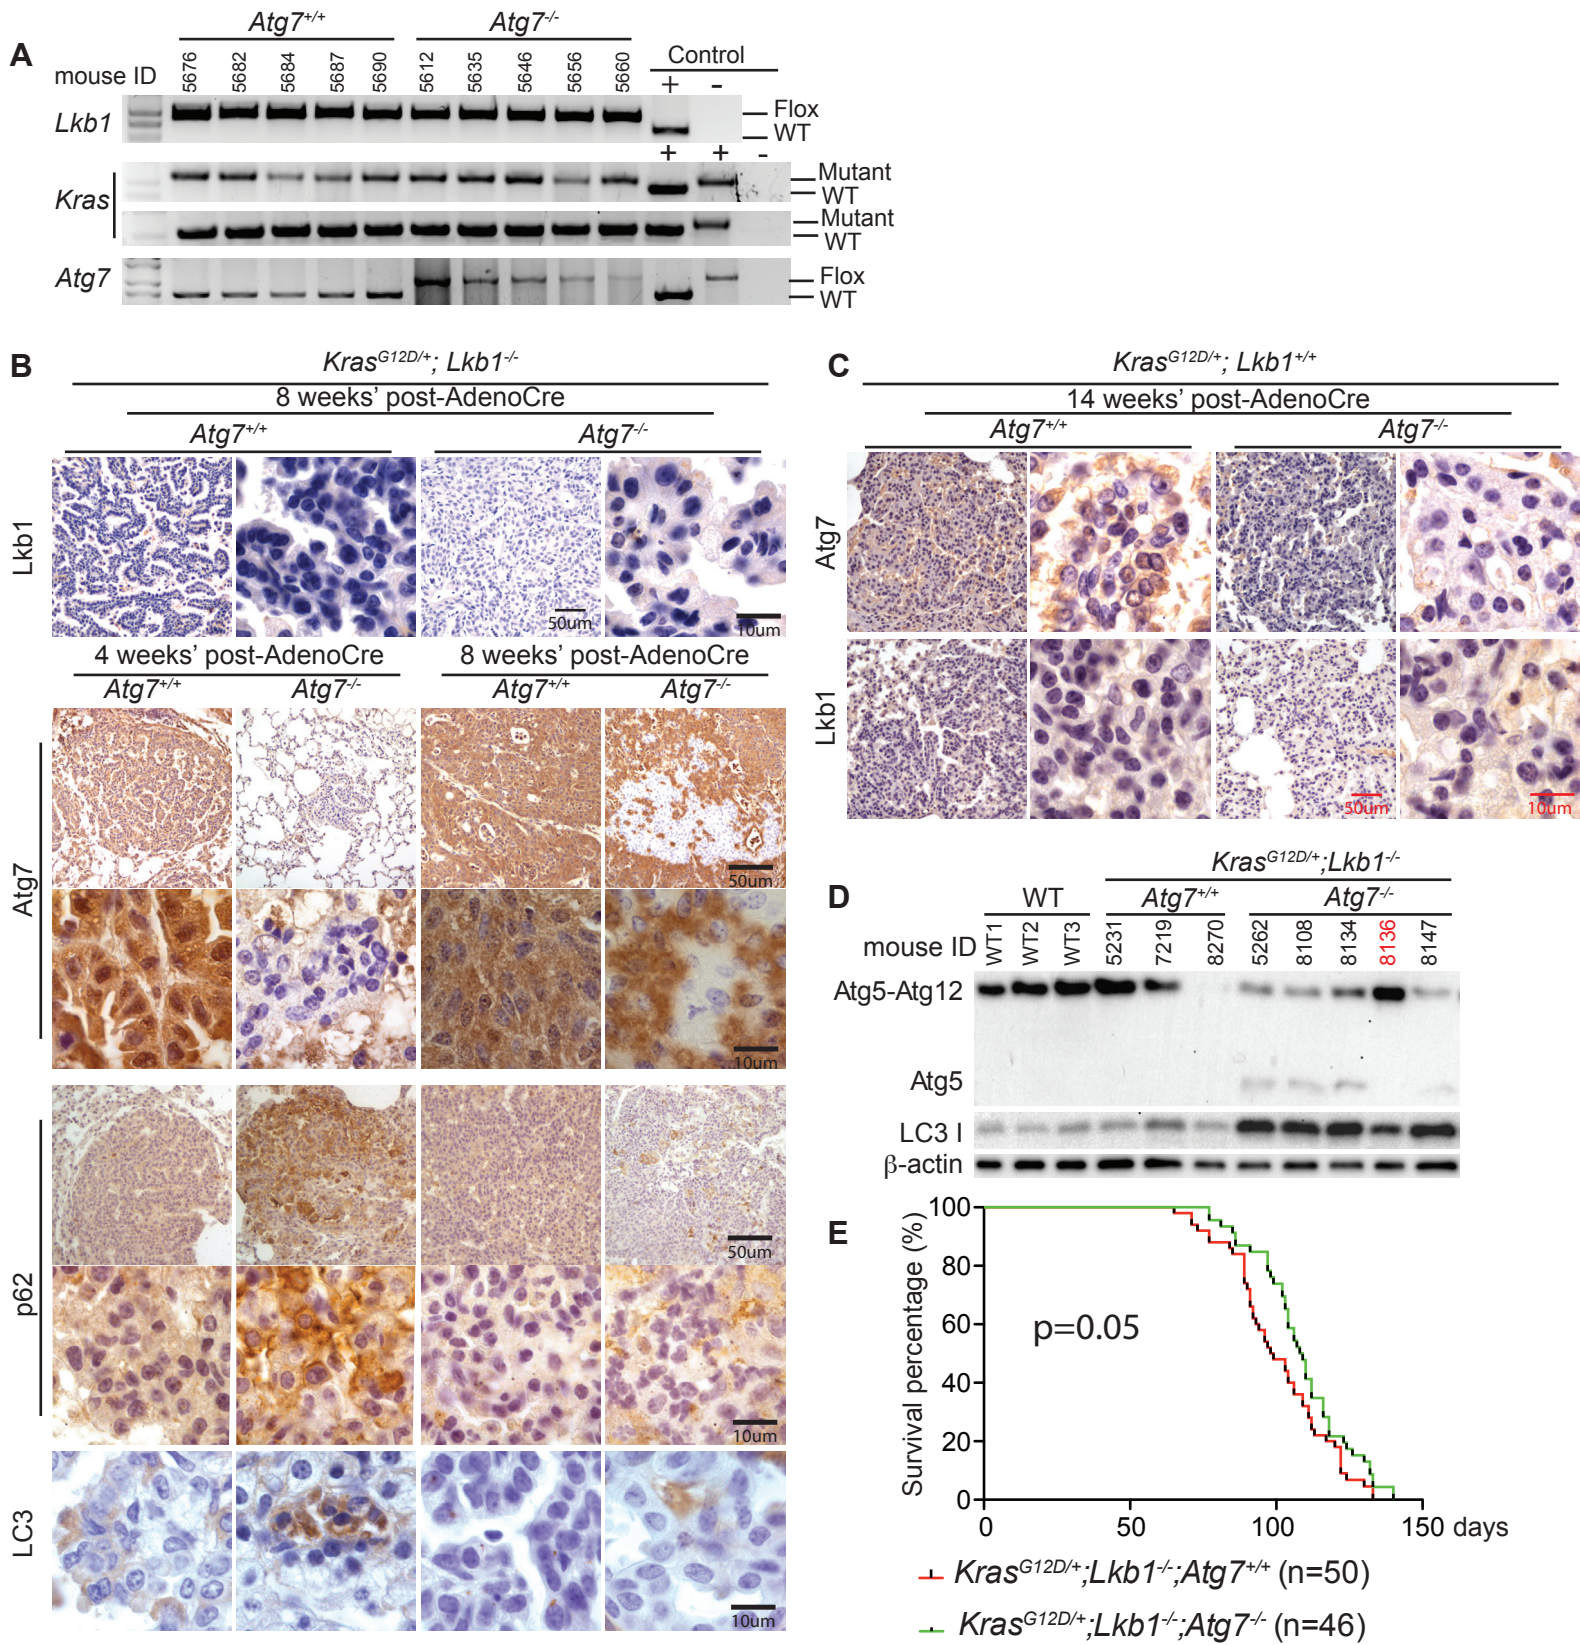

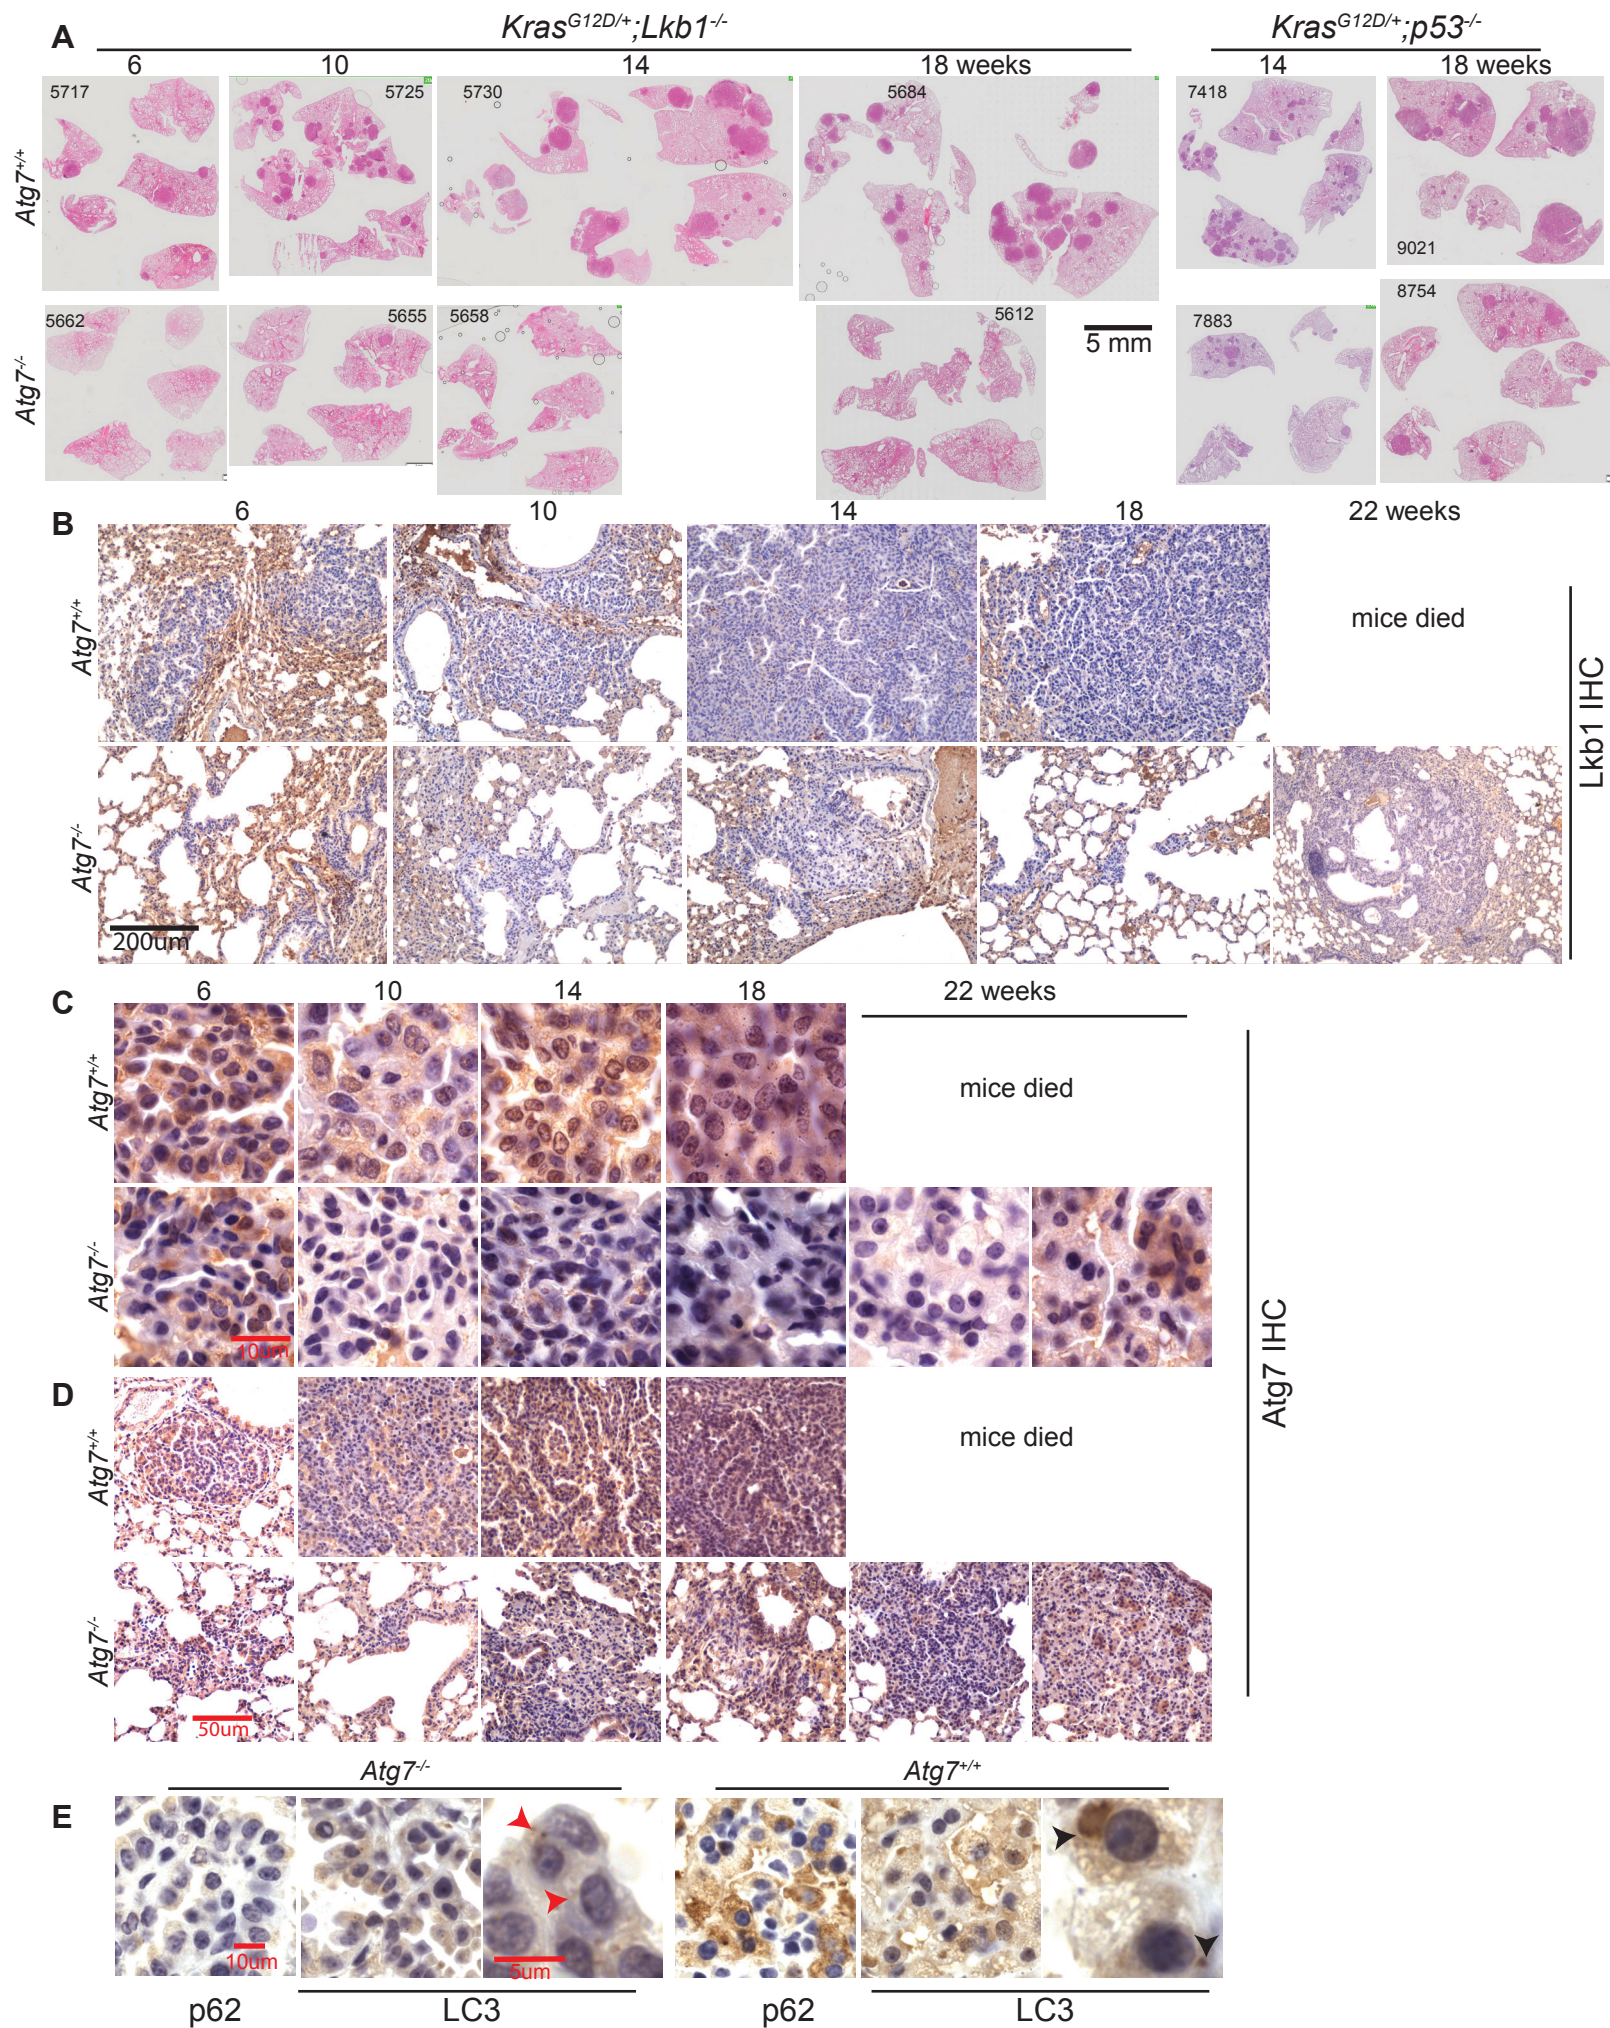

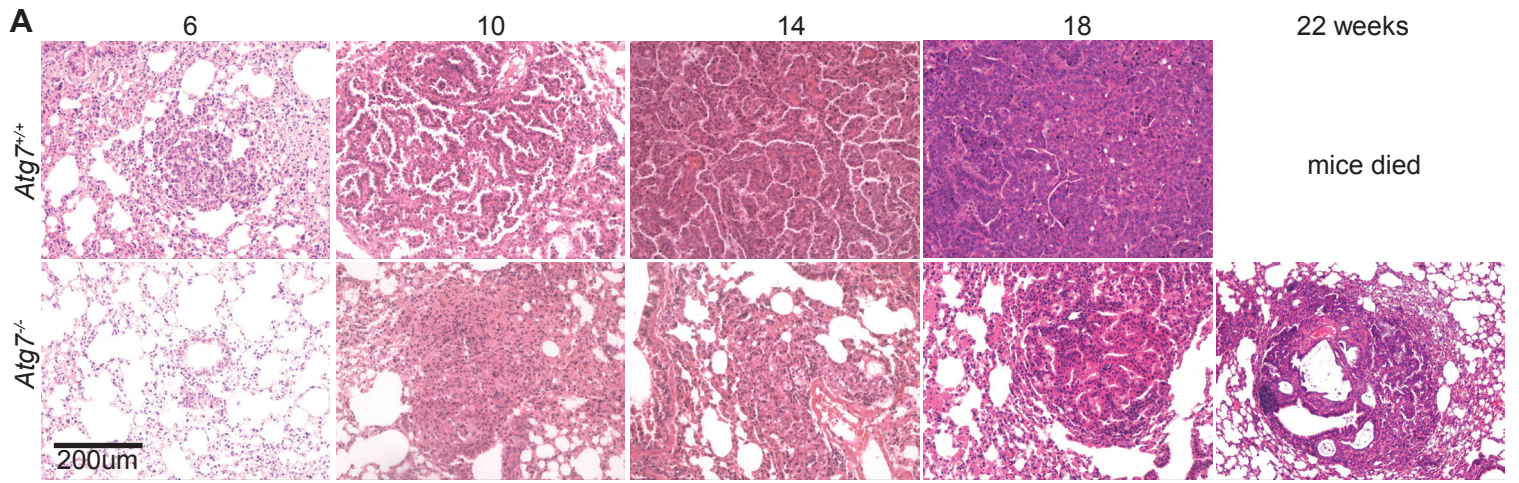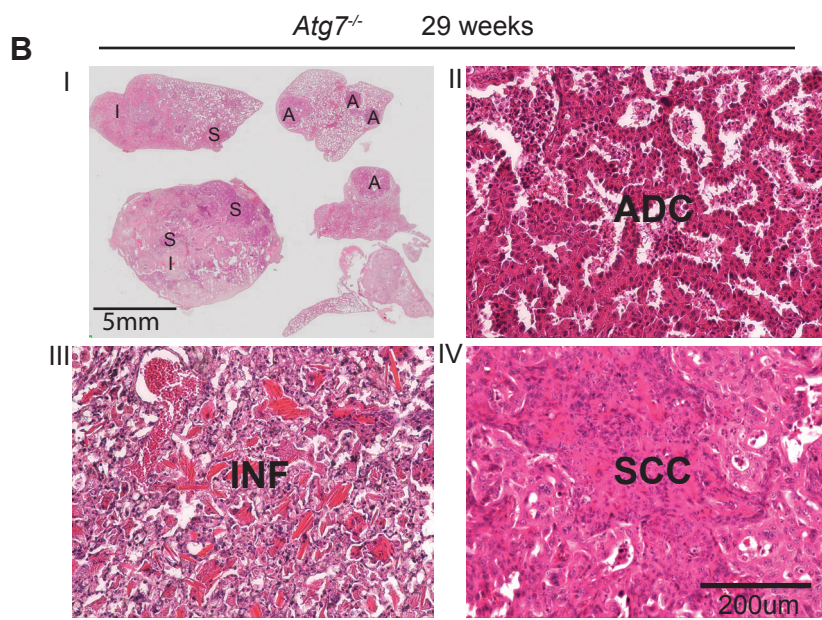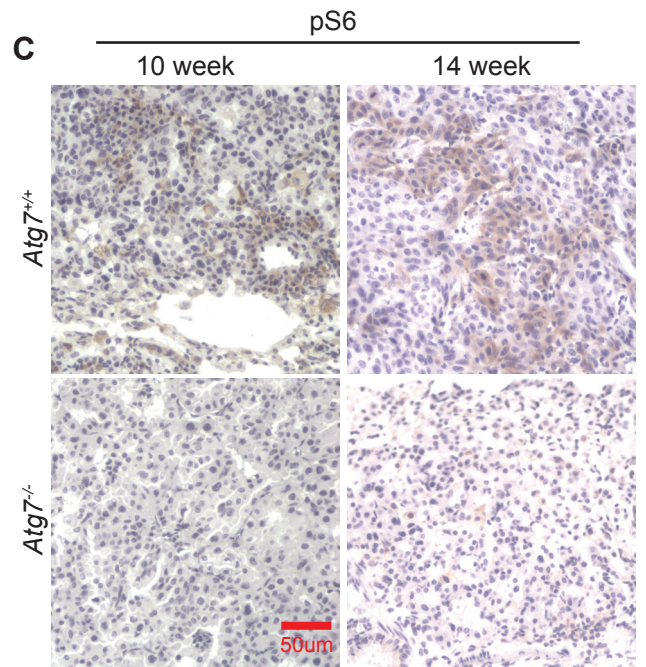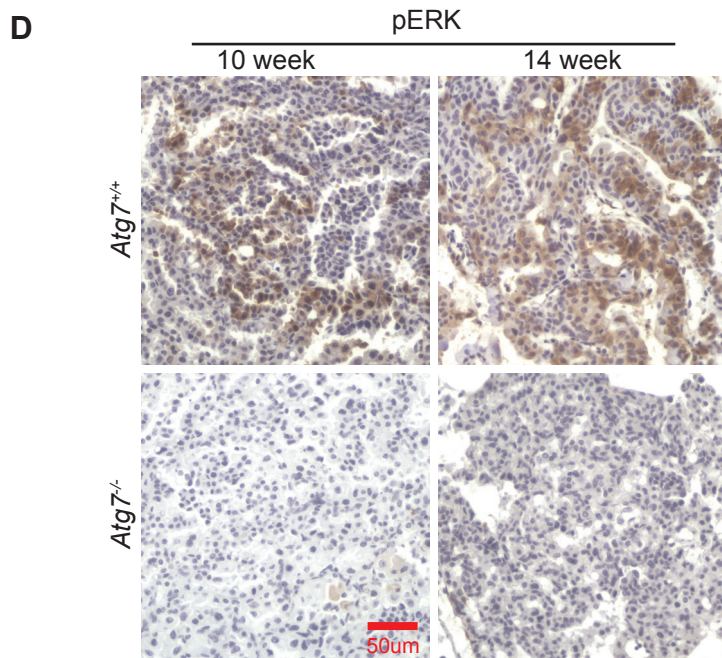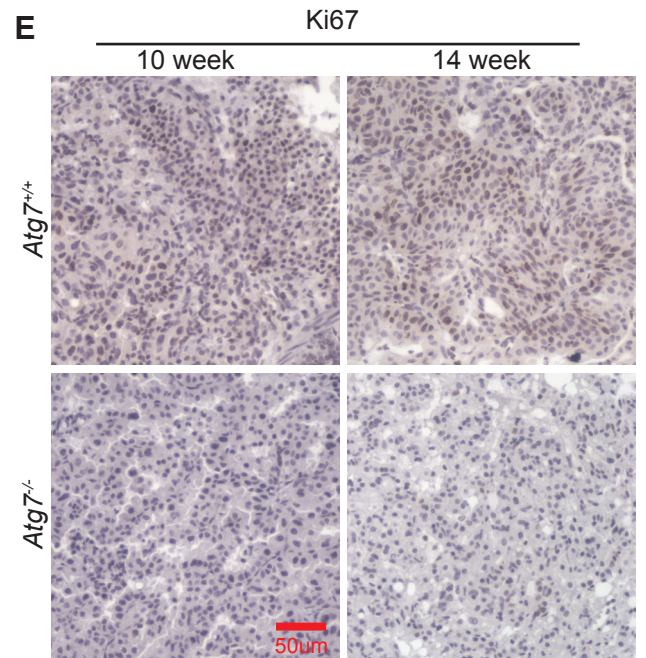

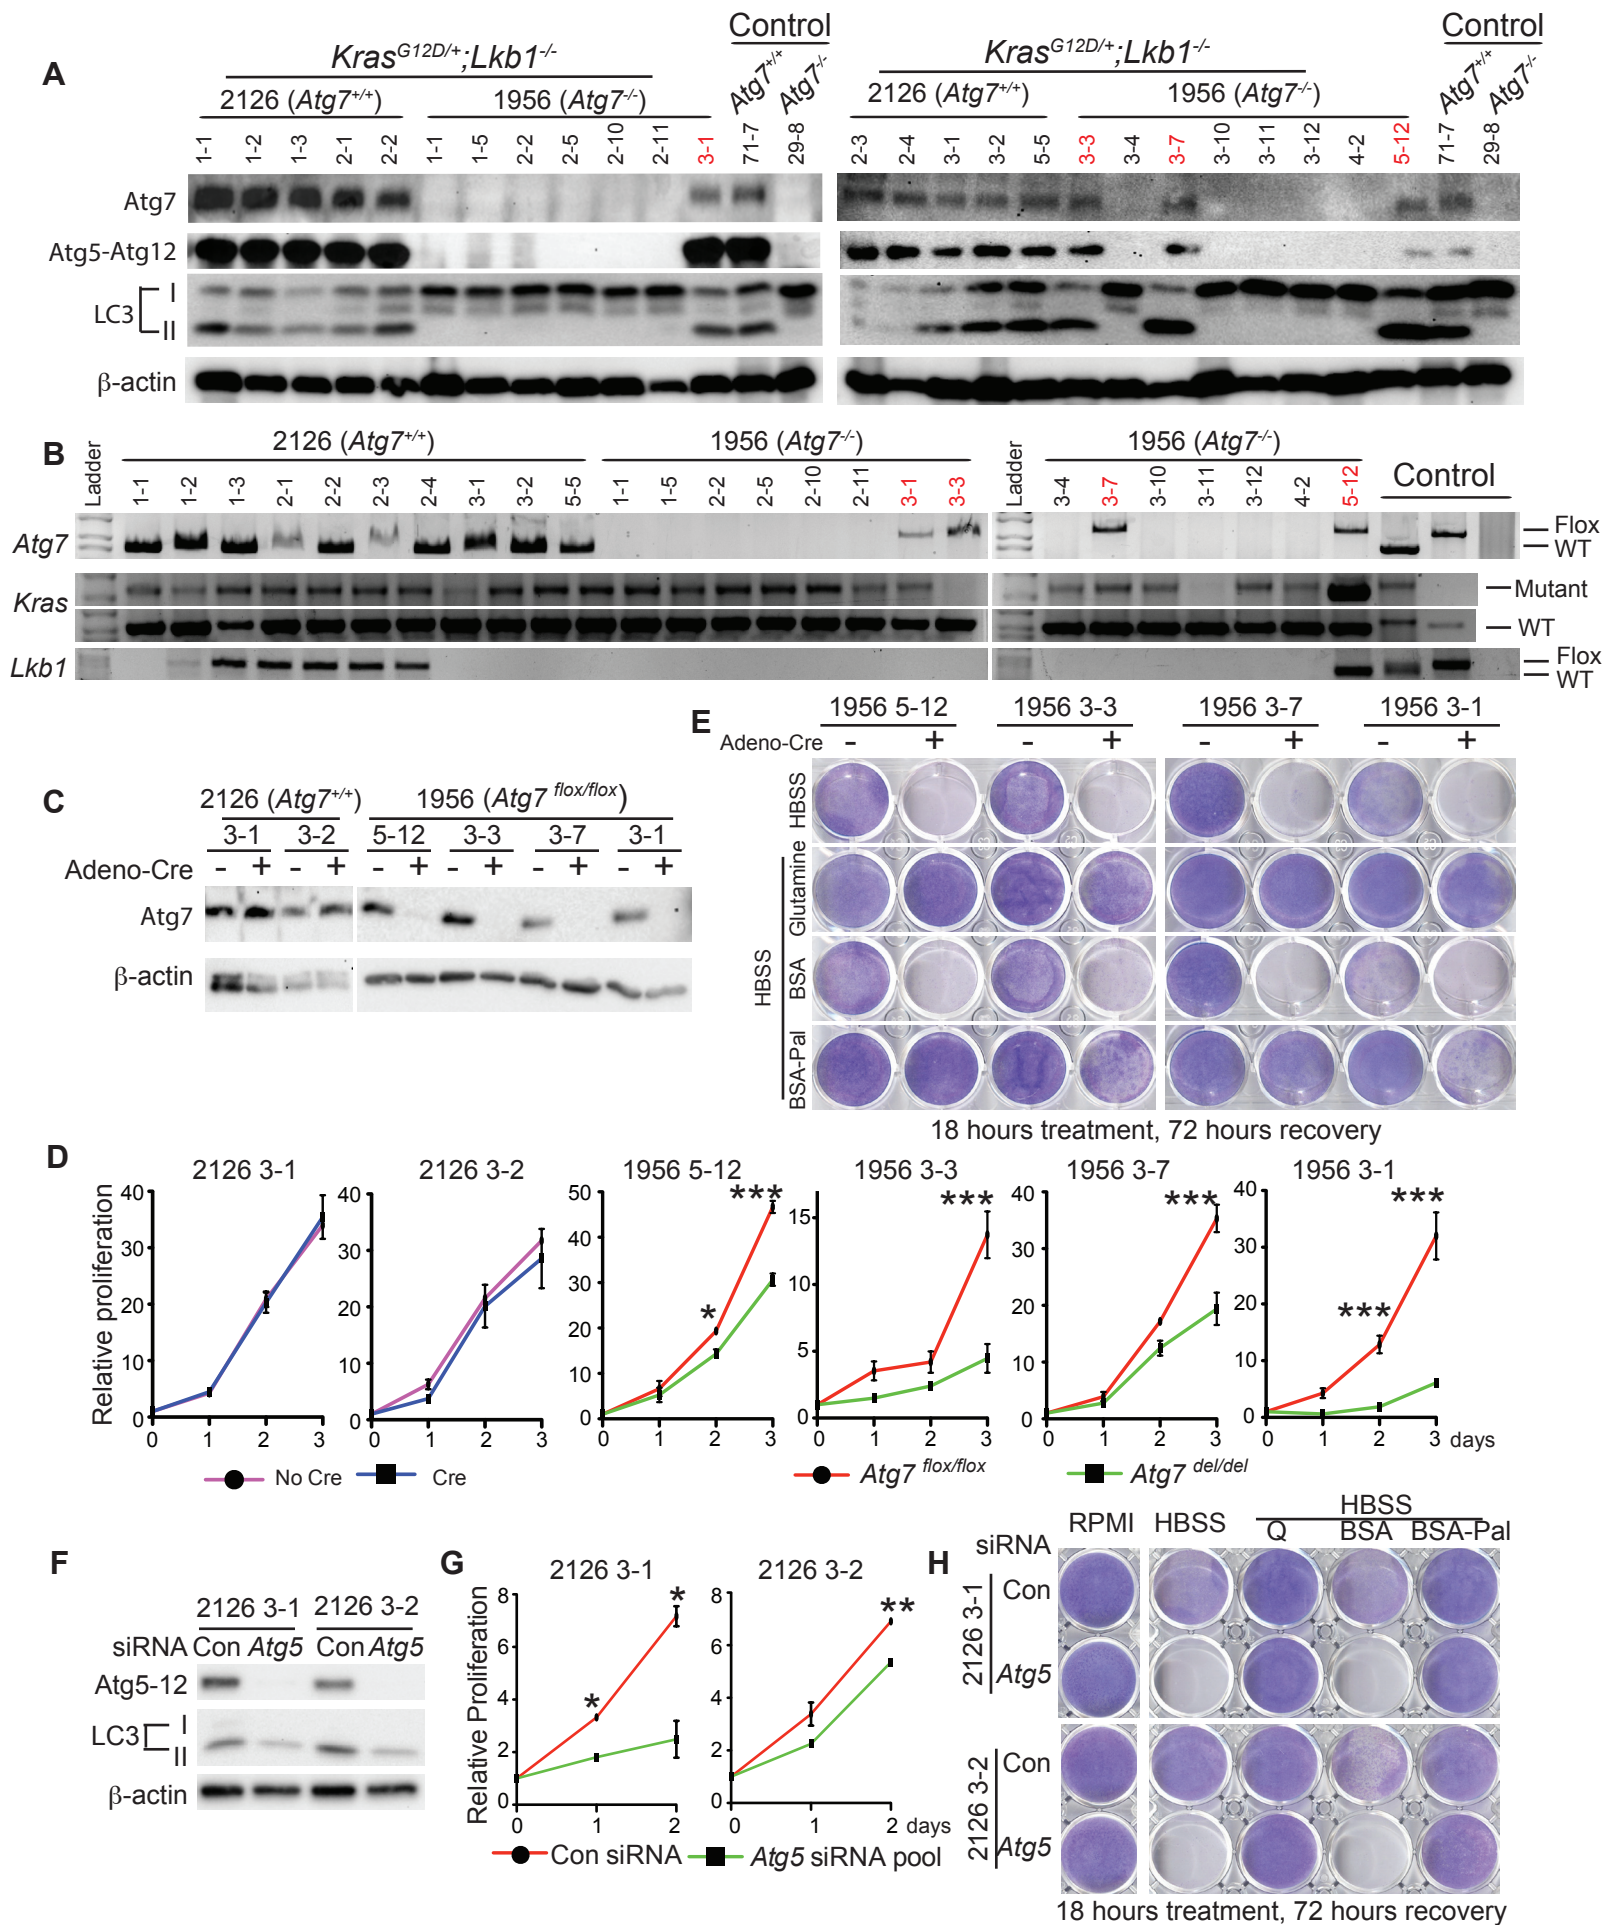

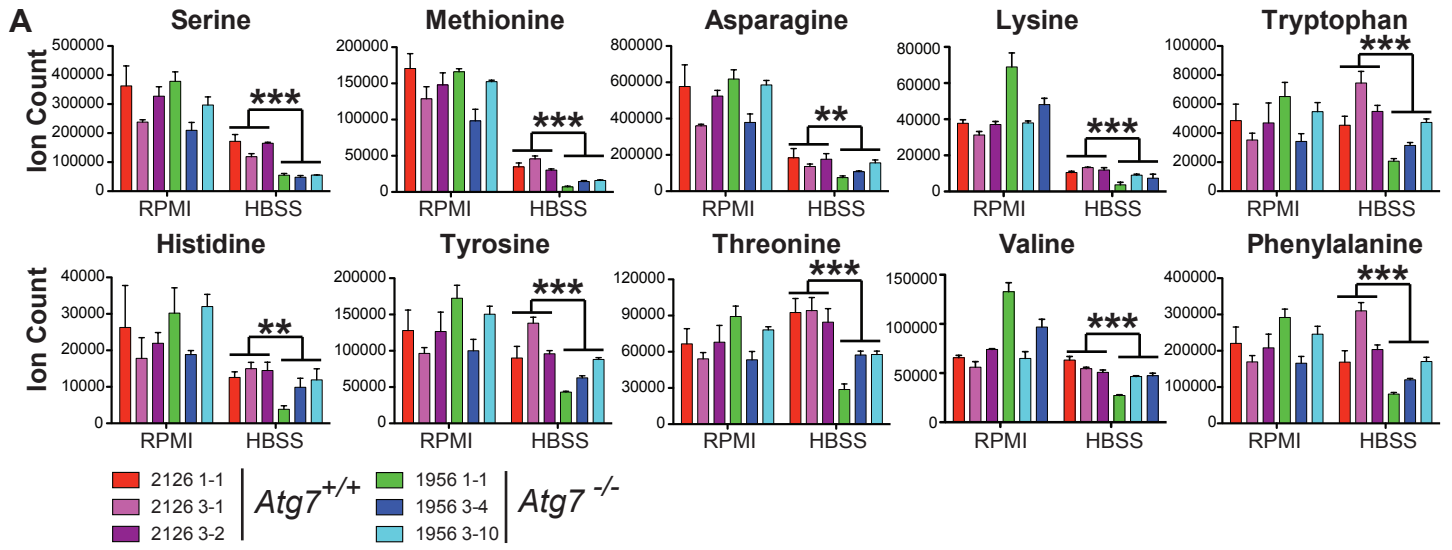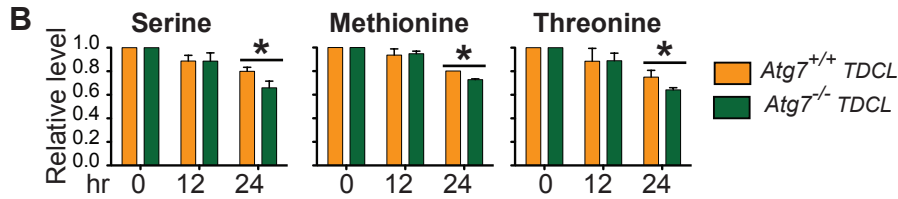

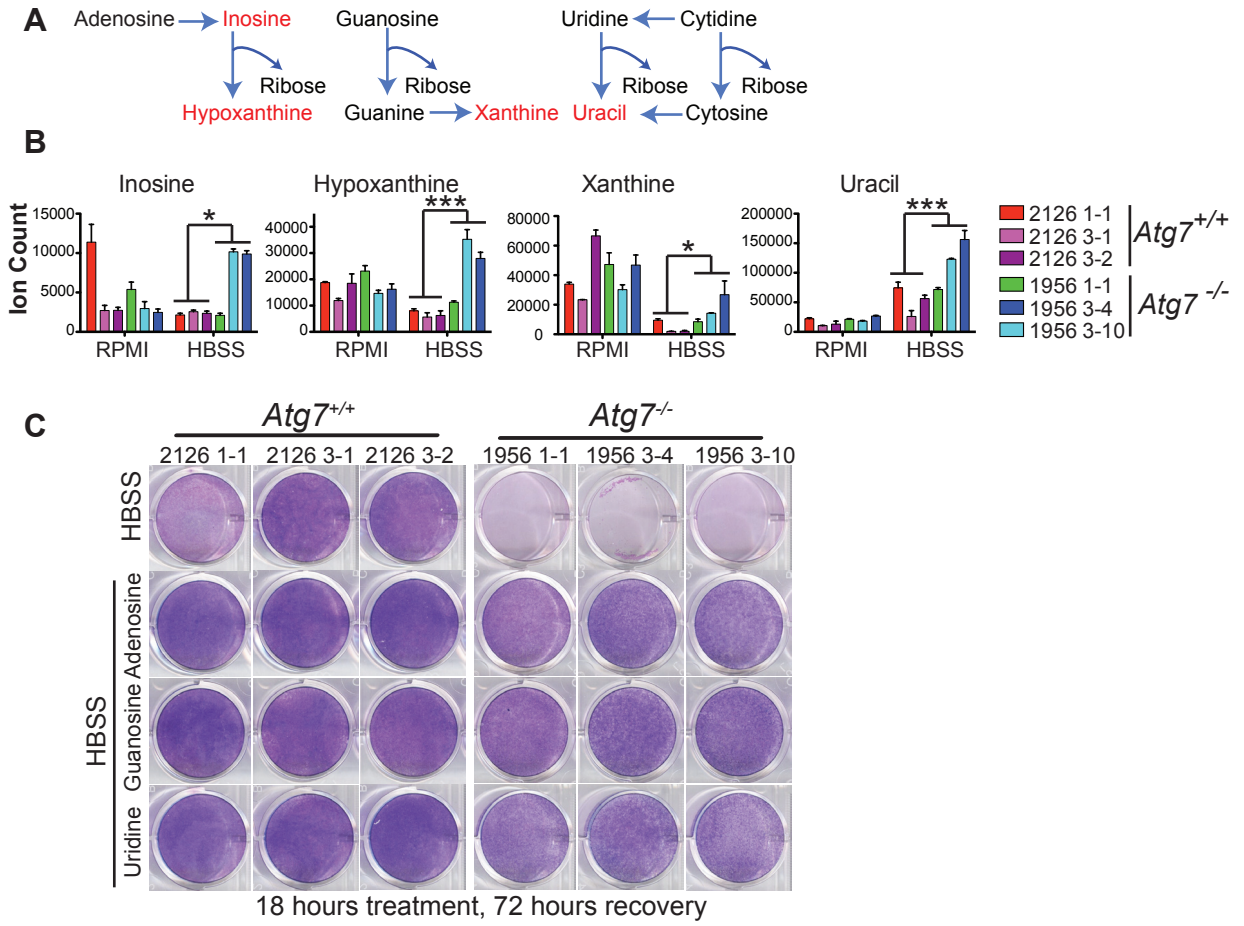

**A**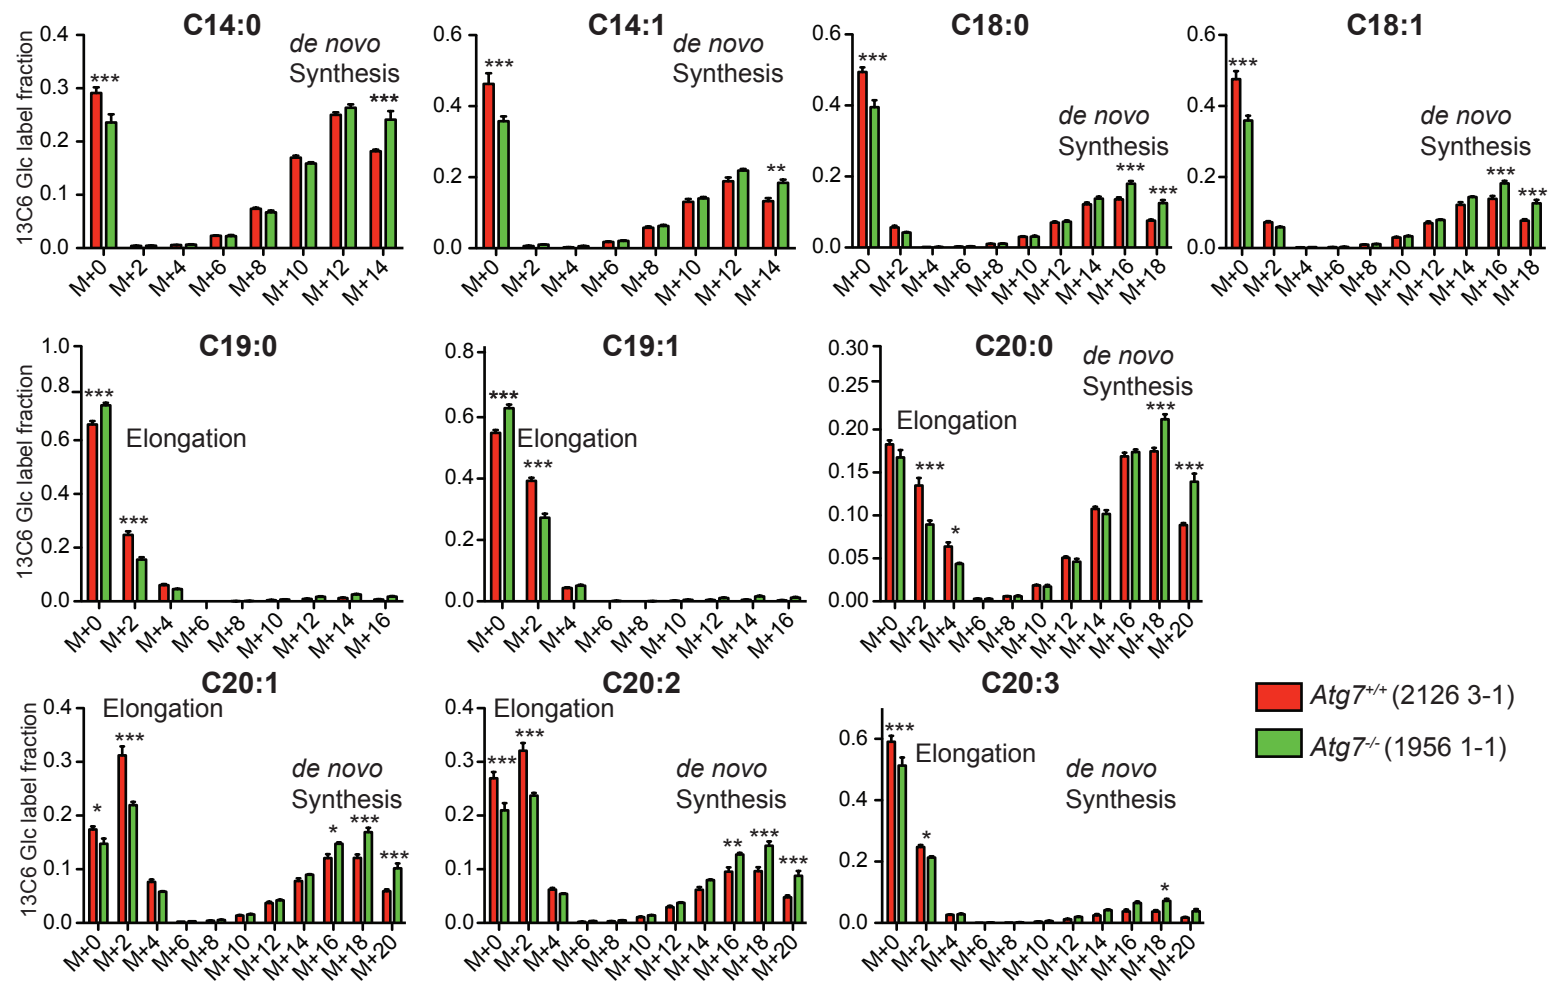**B**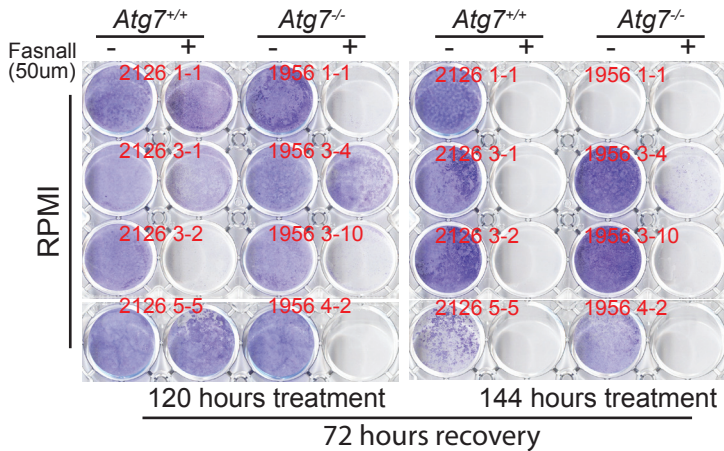**C**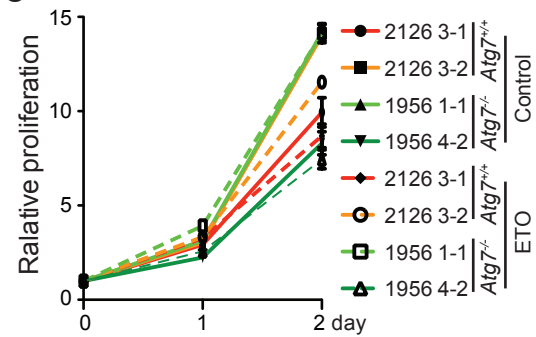**D**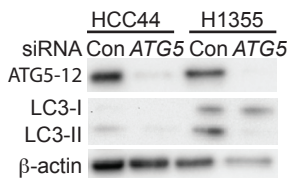**E**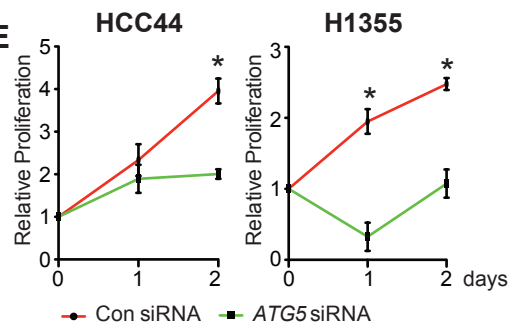**F**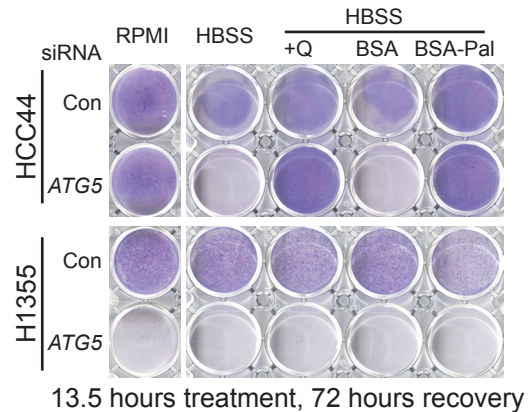

Supplement: supp_gad.320481.118_Supplemental_Data.pdf [file supp_gad.320481.118_Supplemental_Data.pdf]
